# Supplementary material for: Accuracy of Estimating Periodontitis and Its Risk Association Using Partial-Mouth Recordings for Surveillance Studies: A Systematic Review and Meta-Analysis
Source: Int J Dent. 2022 Mar 17;2022:7961199. doi: 10.1155/2022/7961199 (PMC8947864; doi:10.1155/2022/7961199)
Supplement: Supplementary Materials — Appendix Table A-1: list of excluded studies from the systematic review and the reasons for exclusion. Supplementary figures and tables which were referred to in the result section are listed in a separate document. [file 7961199.f1.zip]

Archive with 2 entries (2 files):
- 7961199.f1/Appendix - Exluded studies (2).docx
- 7961199.f1/supplemetary materials (2).docx
